# Supplementary material for: The challenge of silanol species characterization in zeolites
Source: Royal Society of Chemistry journal article supplement (doi:10.1039/d1qi01483h), 2022-01-01
Supplement: d1qi01483h1.pdf [file d1qi01483h1.pdf]

## Supporting Information

### The challenge of silanol species characterization in zeolites

Florent Dubray,<sup>a</sup> Eddy Dib,<sup>a</sup> Izabel Medeiros-Costa,<sup>a,b</sup> Cindy Aquino,<sup>b</sup> Delphine Minoux,<sup>b</sup> Stijn van Daele,<sup>b</sup> Nikolai Nesterenko,<sup>b</sup> Jean-Pierre Gilson<sup>a</sup> and Svetlana Mintova<sup>a,\*</sup>

#### Table of content

|                                                                |        |
|----------------------------------------------------------------|--------|
| Figure S1 : FTIR spectra .....                                 | page 1 |
| Figure S2 : <sup>1</sup> H NMR spectra .....                   | page 2 |
| Figure S3 : SEM images .....                                   | page 3 |
| Table S1 : Quantification of <sup>1</sup> H MAS NMR peaks..... | page 3 |
| Table S2 : Attribution of <sup>31</sup> P MAS NMR peaks .....  | page 3 |

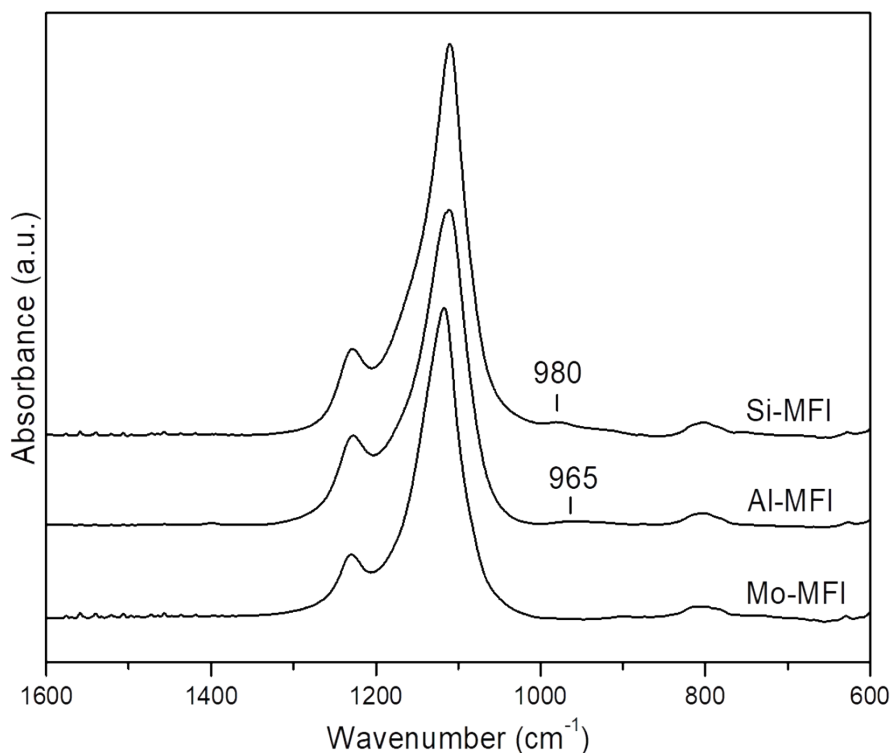

**Figure S1.** FTIR spectra of samples Si-MFI, Al-MFI, and Mo-MFI (spectra recorded under ambient conditions of zeolites dispersed in KBr).

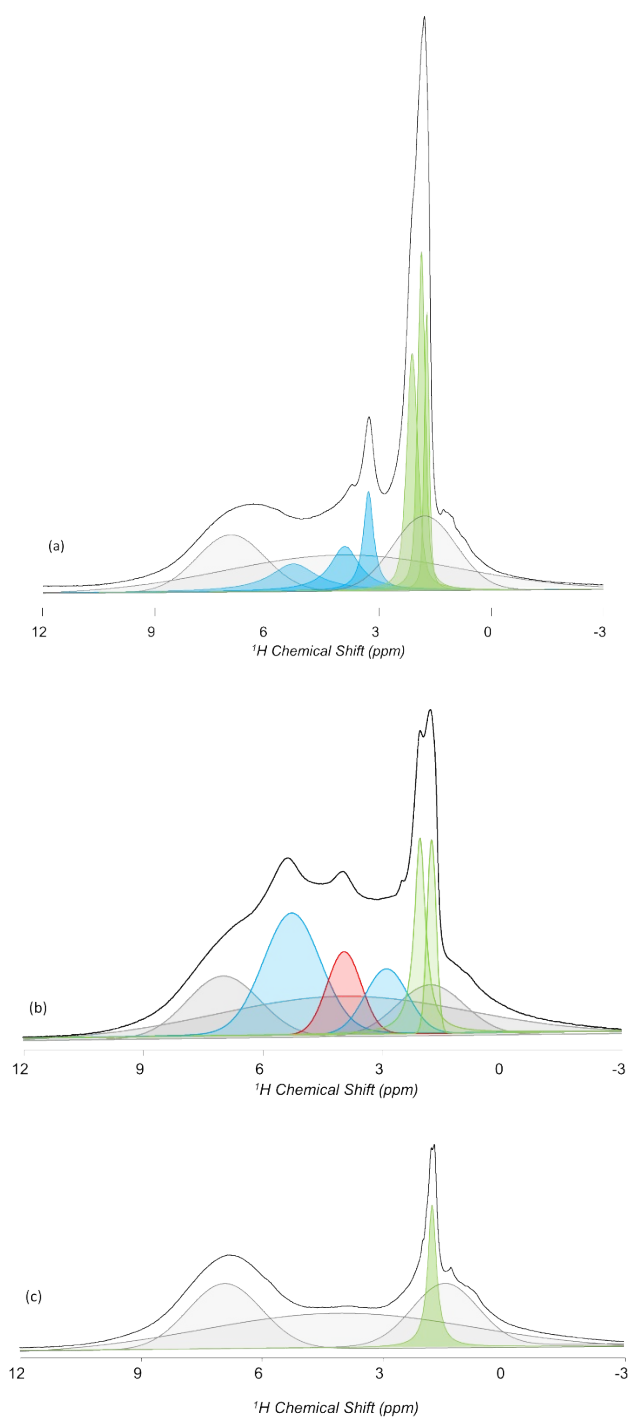

**Figure S2.** Deconvolution of  $^1\text{H}$  MAS NMR spectra of samples (a) Si-MFI, (b) Al-MFI, and (c) Mo-MFI. The black line corresponds to the experimental  $^1\text{H}$  MAS NMR spectra, gray line corresponds to the rotor signal. The green lines correspond to isolated and weakly H-bonded

silanols, blue lines correspond to strongly H-bonded silanols, the red line correspond to Brønsted acid sites in the case of sample Al-MFI.

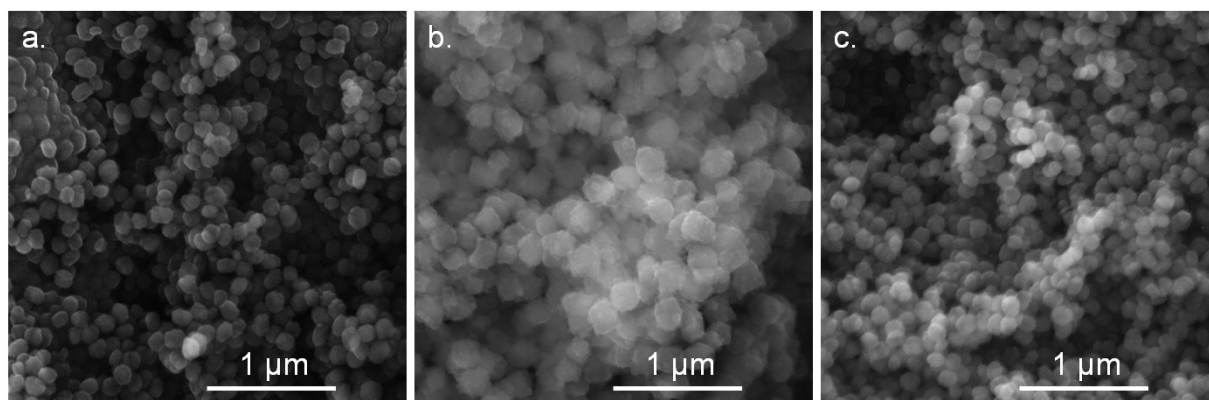

**Figure S3.** SEM images of samples (a) Si-MFI, (b) Al-MFI, and (c) Mo-MFI.

**Table S1.** Quantification of silanol species in samples Si-MFI, Al-MFI, and Mo-MFI based on integration and deconvolution of  $^1\text{H}$  MAS NMR spectra.

| Silanols (mmol/g)              | Si-MFI     | Al-MFI      | Mo-MFI     |
|--------------------------------|------------|-------------|------------|
| Isolated and weakly H bonded   | 3,2        | 4,9         | 0,2        |
| Bronsted acid site             | 0          | 1,8         | 0          |
| Strongly H bonded              | 1,7        | 4,6         | 0          |
| <b>Total silanols (mmol/g)</b> | <b>4,9</b> | <b>11,3</b> | <b>0,2</b> |

**Table S2.** Attribution of  $^{31}\text{P}$  MAS NMR chemical shifts observed for TMPO adsorbed in zeolite samples. [21]

| Chemical shift [ppm] | Attribution                                    |
|----------------------|------------------------------------------------|
| 30                   | Physisorbed TMPO                               |
| 45                   | TMPO interacting with framework Mo             |
| 50                   | TMPO interacting with silanols                 |
| 64 and 75            | TMPO interacting with bridging hydroxyl groups |
